# Supplementary material for: Peritoneal Microbiome in End-Stage Renal Disease Patients and the Impact of Peritoneal Dialysis Therapy
Source: MDPI journal article supplement (doi:10.3390/microorganisms8020173), 2020-01-25
Supplement: s1 [file s1]

## Supplementary material

# Peritoneal Microbiome in End-Stage Renal Disease Patients and the Impact of Peritoneal Dialysis Therapy

Liliana Simões-Silva, Ricardo Araujo, Manuel Pestana, Isabel Soares-Silva,  
Benedita Sampaio-Maia

| Table of contents                                                                                                                                                                                                              | Pag. |
|--------------------------------------------------------------------------------------------------------------------------------------------------------------------------------------------------------------------------------|------|
| Figure S1: Rarefaction curves.....                                                                                                                                                                                             | 2    |
| Figure S2: Relative proportion taxa for class, order, genus, and species.....                                                                                                                                                  | 3    |
| Figure S3: Abundances of the genera and families between the ESRD-PD and ESRD-nonPD.....                                                                                                                                       | 4    |
| Figure S4: Alpha diversity of the peritoneum microbiome community at phylum, class, order, family, genus, species and OUT taxonomic levels calculated with Observed, Chao1, Shannon, Simpson, and Inverse Simpson indexes..... | 16   |
| Figure S5: Beta-diversity of the peritoneum microbiome community at OTU level with Bray-Curtis, Jaccard, unweighted Unifrac, and Weighted Unifrac .....                                                                        | 18   |
| Figure S6: Non-metric multidimensional scaling of blood and peritoneum microbiomes of non-PD and PD patients .....                                                                                                             | 19   |

**Figure S1**

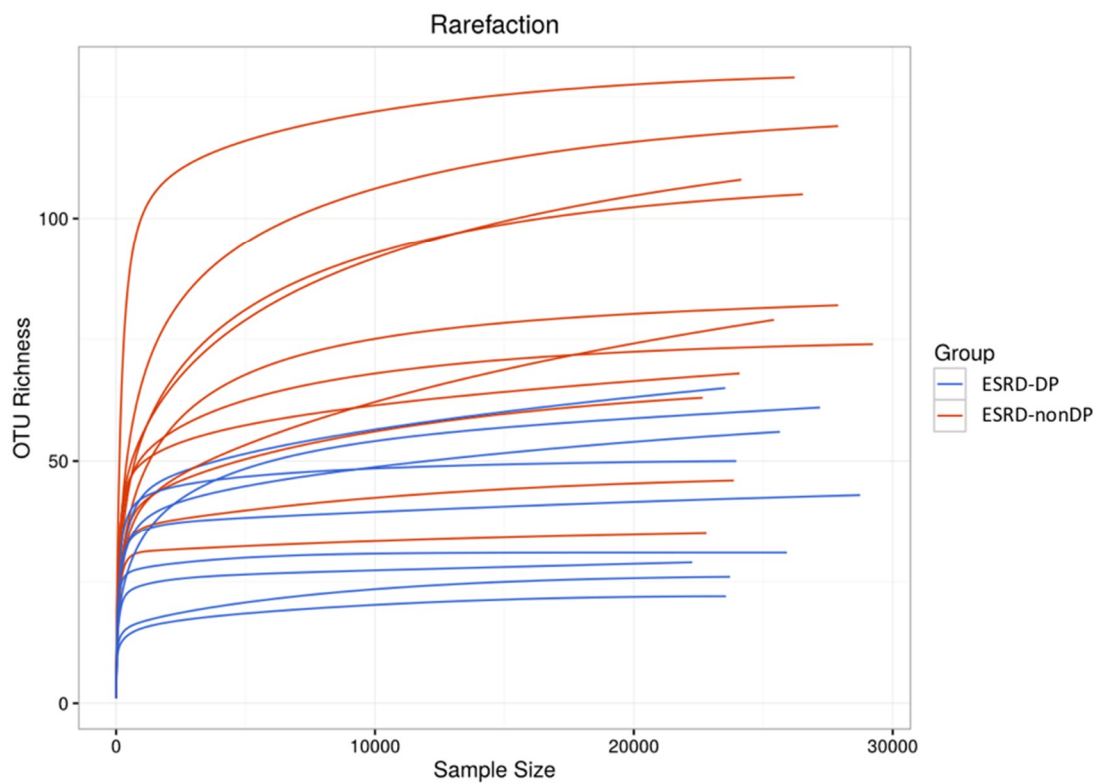

**Figure S1:** The rarefaction curves plotted with all groups cumulatively. The rarefaction analysis curves suggest the sample diversity was captured as expected given the average sequence pairs classified into operational taxonomic units (OTU).

**Figure S2**

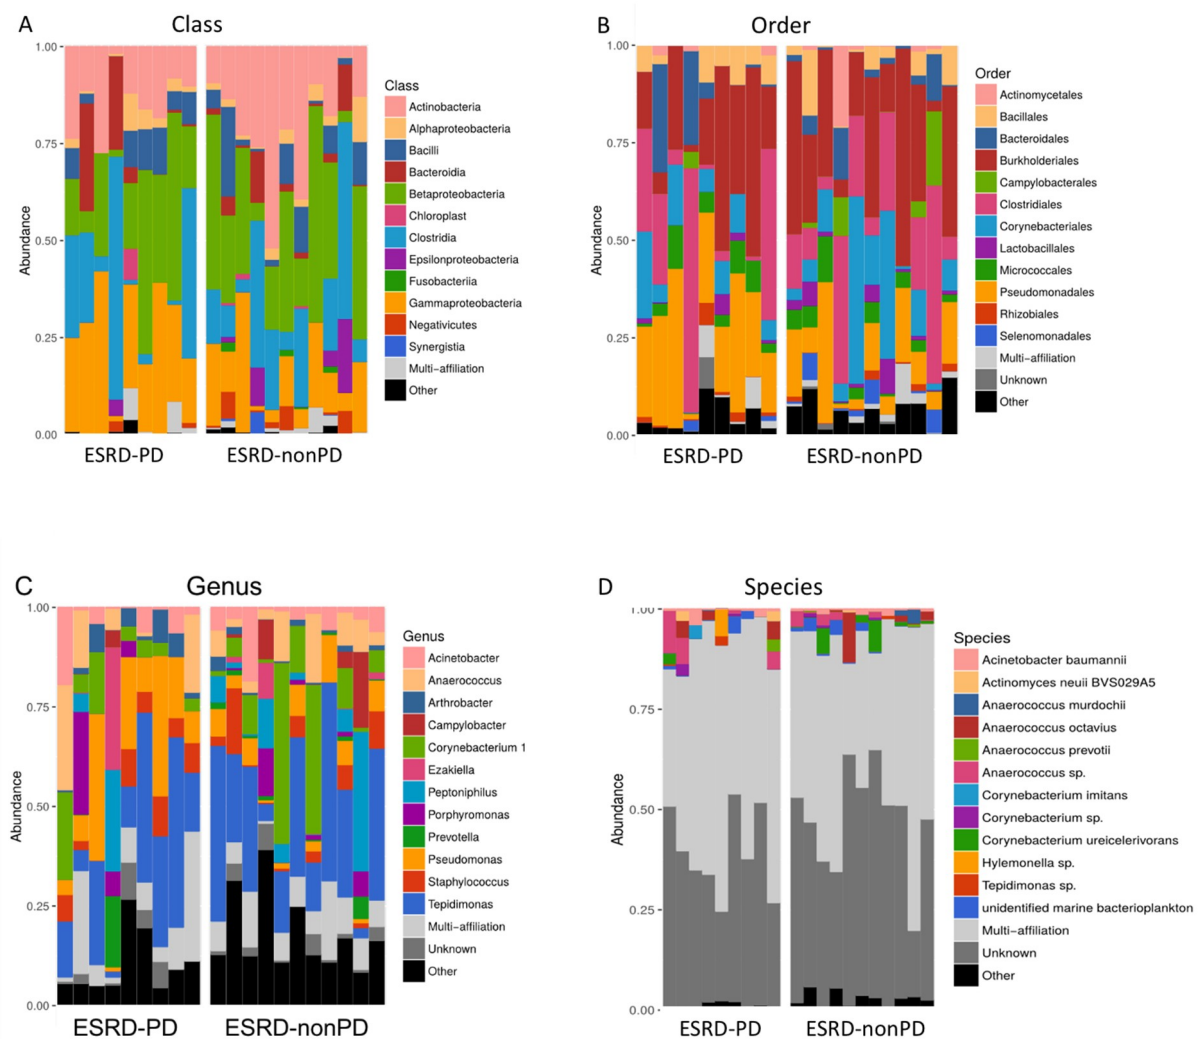

**Figure S2:** Relative proportion taxa for class (A), order (B), genus (C), and species (D).

Taxa are identified by name in the plot for abundance >1%. Taxa are merged into the

“Other” category only if it exists in any sample with abundance greater than 0.01%.

Taxa are merged into the “Multi-affiliation” category when they can correspond to

two or more different taxa. ESRD-PD – End-stage renal disease patients undergoing

peritoneal dialysis; ESRD-nonPD – End-stage renal disease patients with intact

peritoneal cavity.

Figure S3

A Bacteria.Actinobacteria.Actinobacteria.Actinomycetales.Actinomycetaceae.Actinomyces

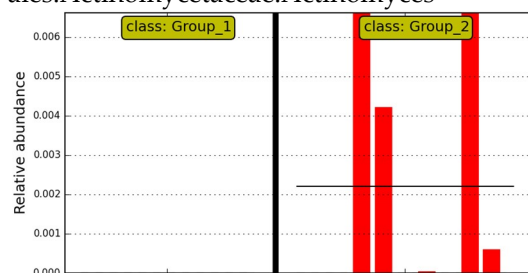

B Bacteria.Actinobacteria.Actinobacteria.Actinomycetales.Actinomycetaceae.Actinomyces.Unknown.Cluster\_110

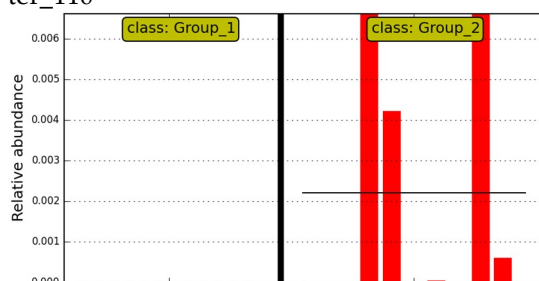

C Bacteria.Actinobacteria.Actinobacteria.Bifidobacteriales

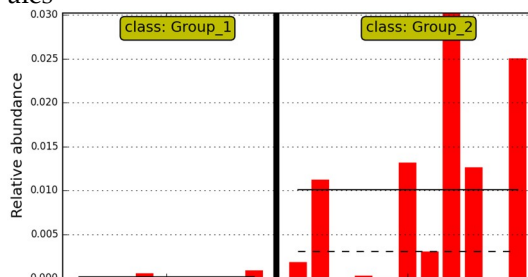

D Bacteria.Actinobacteria.Actinobacteria.Bifidobacteriales.Bifidobacteriaceae

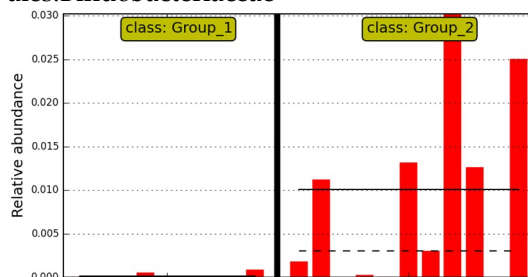

E Bacteria.Actinobacteria.Actinobacteria.Bifidobacteriales.Bifidobacteriaceae.Bifidobacterium

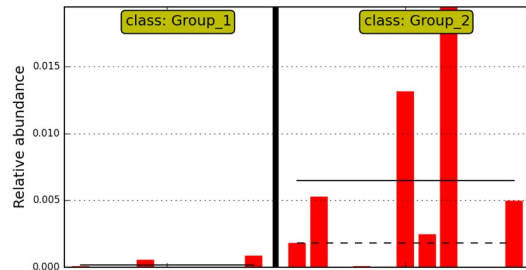

F Bacteria.Actinobacteria.Actinobacteria.Bifidobacteriales.Bifidobacteriaceae.Bifidobacterium.Multi\_affiliation

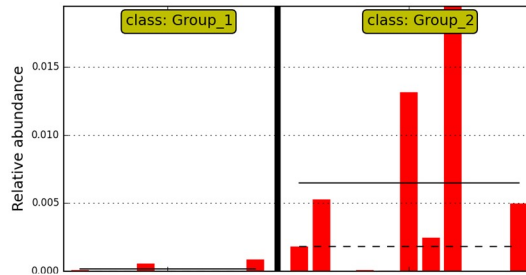

G Bacteria.Actinobacteria.Actinobacteria.Bifidobacteriales.Bifidobacteriaceae.Gardnerella

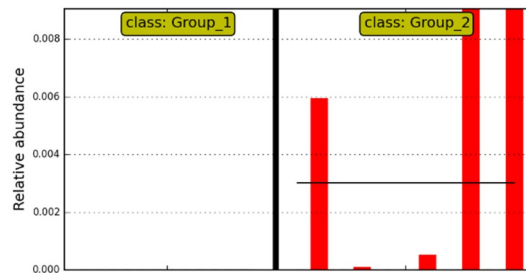

H Bacteria.Actinobacteria.Actinobacteria.Bifidobacteriales.Bifidobacteriaceae.Gardnerella.Multi\_affiliation

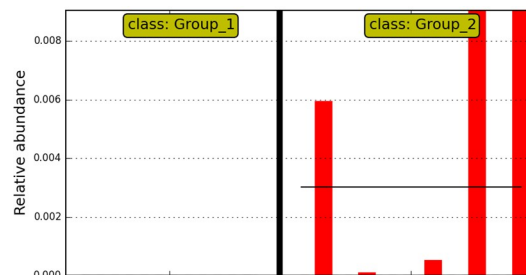

I Bacteria.Actinobacteria.Actinobacteria.Bifidobacteriales.Bifidobacteriaceae.Gardnerella.Multi\_affiliation.Cluster\_88

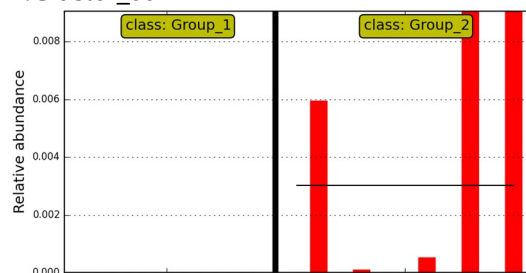

J Bacteria.Actinobacteria.Actinobacteria.Corynebacterales.Corynebacteriaceae.Corynebacterium

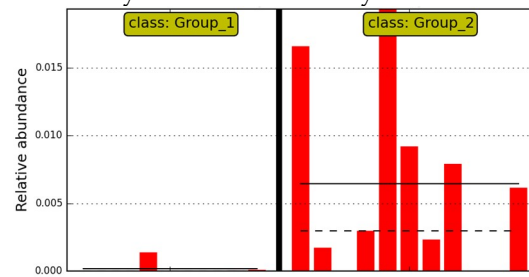

K Bacteria.Actinobacteria.Actinobacteria.Corynebacterales.Corynebacteriaceae.Corynebacterium1.Corynebacteriummureicelerivorans

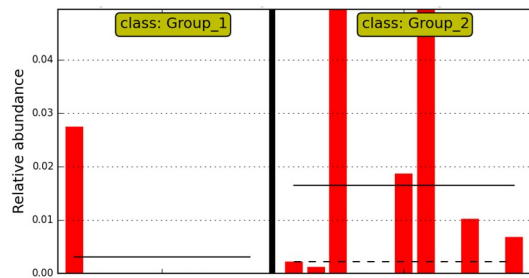

L Bacteria.Actinobacteria.Actinobacteria.Corynebacterales.Corynebacteriaceae.Corynebacterium1.Corynebacteriummureicelerivorans.Cluster\_26

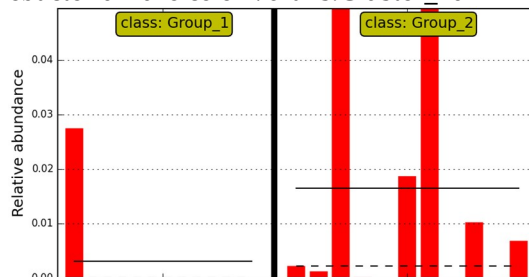

M Bacteria.Actinobacteria.Actinobacteria.Corynebacterales.Corynebacteriaceae.Corynebacterium1.Unknown.Cluster\_18

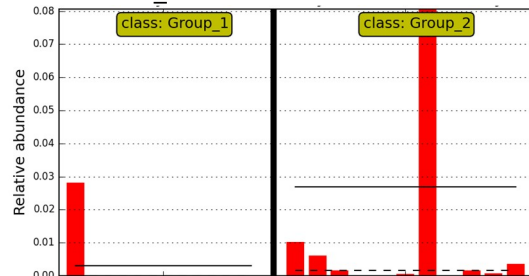

N Bacteria.Actinobacteria.Actinobacteria.Corynebacterales.Corynebacteriaceae.Corynebacterium.Multi-affiliation

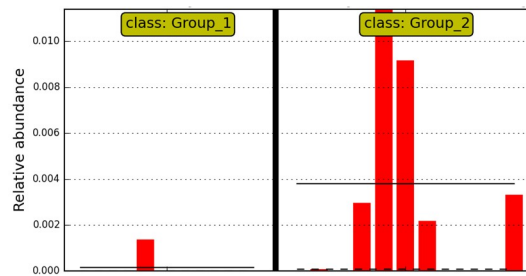

O Bacteria.Actinobacteria.Actinobacteria.Corynebacteriales.Corynebacteriaceae.Corynebacterium.Multi\_affiliation.Cluster\_82

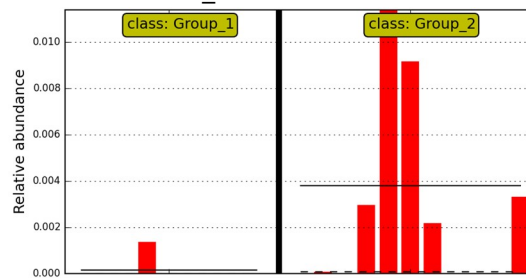

P Bacteria.Actinobacteria.Actinobacteria.Micrococcales.Multi\_affiliation

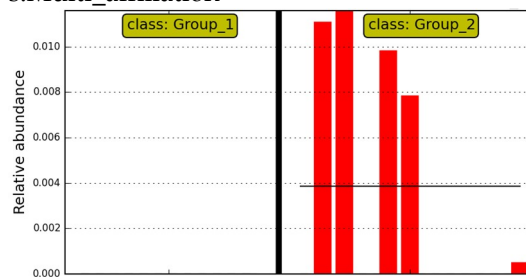

Q Bacteria.Actinobacteria.Actinobacteria.Micrococcales.Multi\_affiliation.Multi\_affiliation

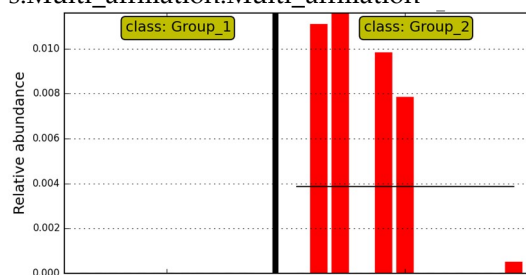

R Bacteria.Actinobacteria.Actinobacteria.Micrococcales.Multi\_affiliation.Multi\_affiliation.Multi\_affiliation

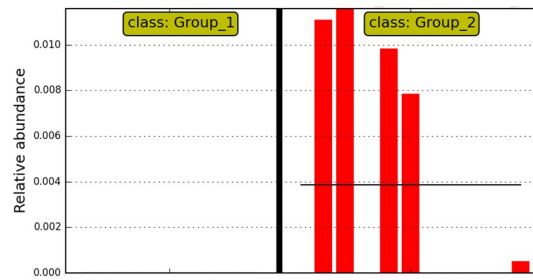

S Bacteria.Actinobacteria.Actinobacteria.Micrococcale  
s.Multi\_affiliation.Multi\_affiliation.Multi\_affiliation  
.Cluster\_77

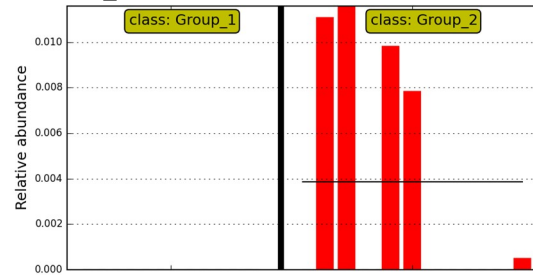

T Bacteria.Bacteroidetes.Bacteroidia.Bacteroidales.Pre  
votellaceae

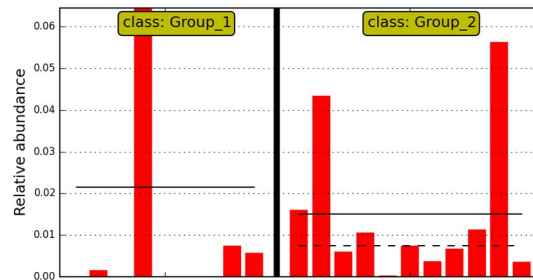

U Bacteria.Bacteroidetes.Bacteroidia.Bacteroidales.Pre  
votellaceae.Prevotella

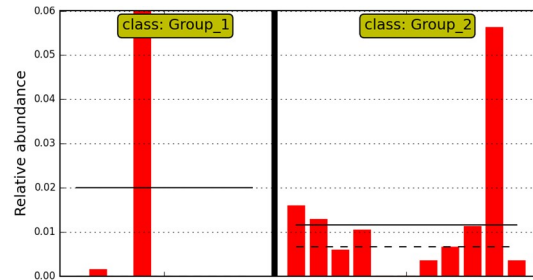

V Bacteria.Bacteroidetes.Bacteroidia.Bacteroidales.Pre  
votellaceae.Prevotella7.Prevotellasp\_

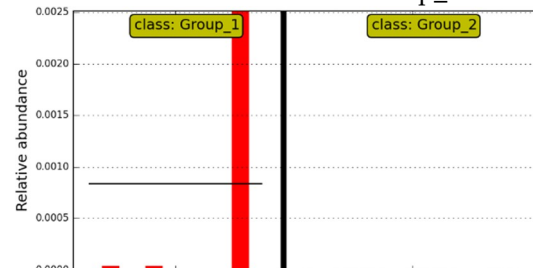



W Bacteria.Bacteroidetes.Bacteroidia.Bacteroidales.Pre  
votellaceae.Prevotella7.Prevotellasp\_.Cluster\_227

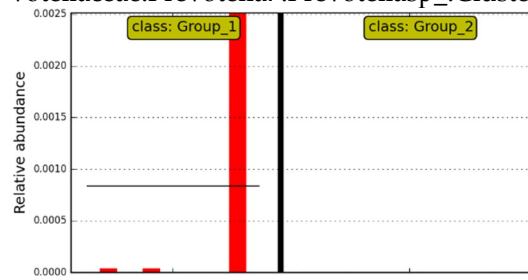

X Bacteria.Bacteroidetes.Bacteroidia.Bacteroidales.Pre  
votellaceae.Prevotella.Multi\_affiliation

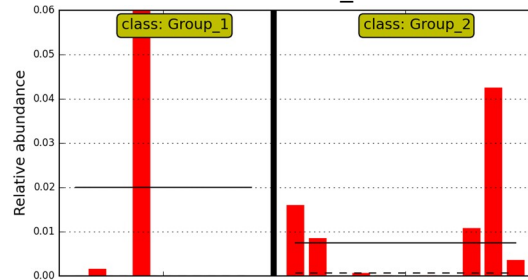

Y Bacteria.Bacteroidetes.Bacteroidia.Bacteroidales.Pre  
votellaceae.Prevotella.Multi\_affiliation.Cluster\_17

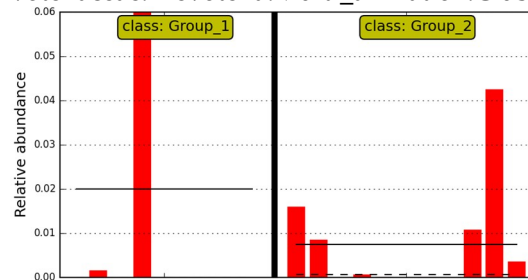

Z Bacteria.Bacteroidetes.Bacteroidia.Bacteroidales.Pre  
votellaceae.Prevotella.Unknown

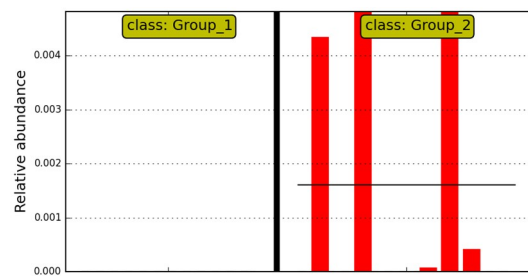

AA Bacteria.Firmicutes.Bacilli.Bacillales.Staphylococcaeae.Staphylococcus.Multi\_affiliation.Cluster\_78

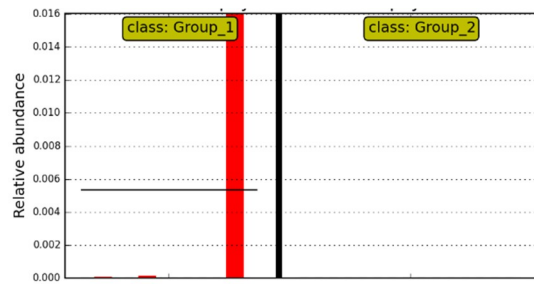

AB Bacteria.Firmicutes.Bacilli.Lactobacillales.Lactobacil  
laceae

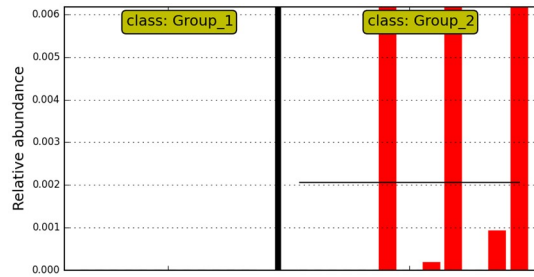

AC Bacteria.Firmicutes.Bacilli.Lactobacillales.Lactobacil  
laceae.Lactobacillus

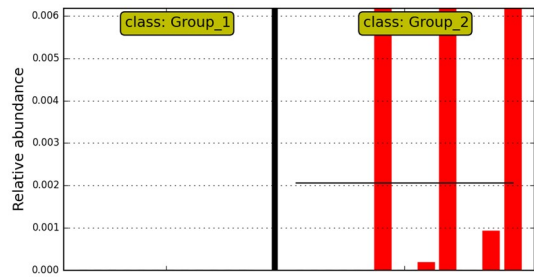

AD Bacteria.Firmicutes.Bacilli.Lactobacillales.Lactobacil  
laceae.Lactobacillus.Multi\_affiliation

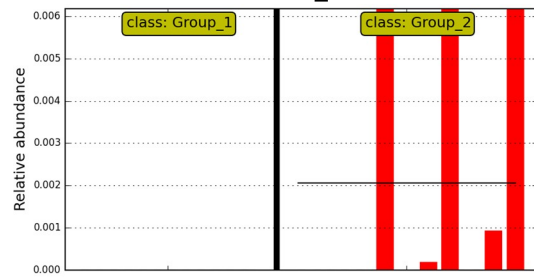

AE Bacteria.Firmicutes.Clostridia.Clostridiales.FamilyX  
I.Peptoniphilus.CandidatusPeptoniphilusmassilien  
sis

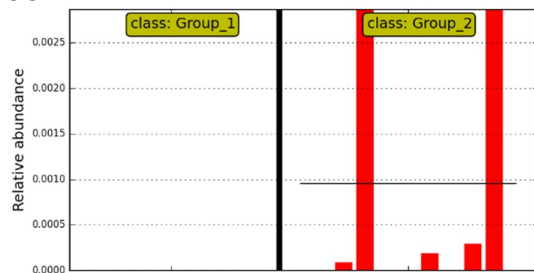

AF Bacteria.Firmicutes.Clostridia.Clostridiales.FamilyX  
I.Peptoniphilus.CandidatusPeptoniphilusmassilien  
sis.Cluster\_211

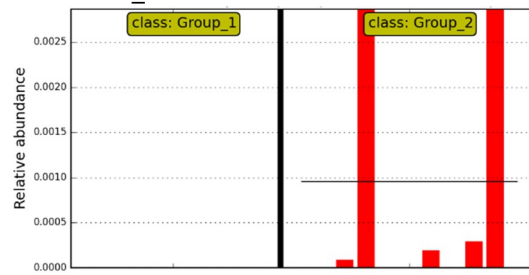

AG Bacteria.Firmicutes.Clostridia.Clostridiales.Peptoco  
ccaceae

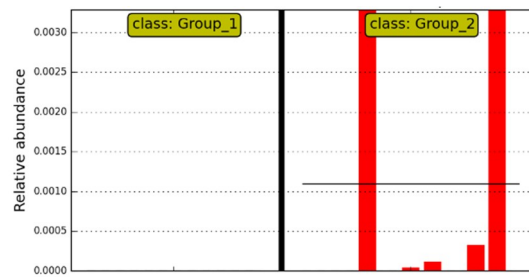

AH Bacteria.Firmicutes.Clostridia.Clostridiales.Peptoco  
ccaceae.Peptococcus

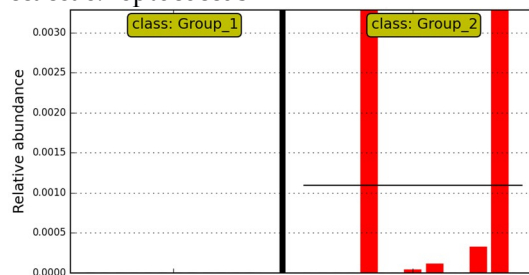

AI Bacteria.Firmicutes.Clostridia.Clostridiales.Peptoco  
ccaceae.Peptococcus.Unknown

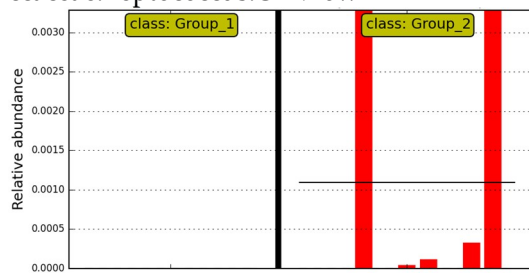

AJ Bacteria.Firmicutes.Clostridia.Clostridiales.Peptoco  
ccaceae.Peptococcus.Unknown.Cluster\_158

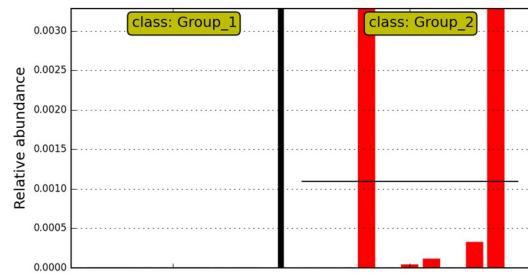

AK Bacteria.Fusobacteria

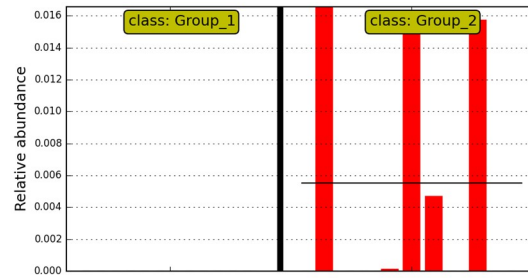

AL Bacteria.Fusobacteria.Fusobacteriia

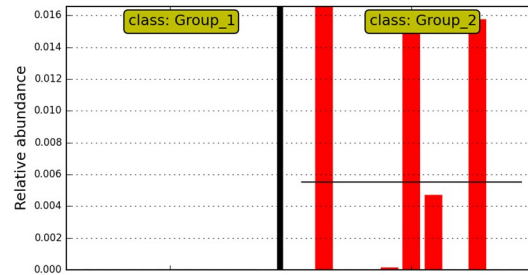

AM Bacteria.Fusobacteria.Fusobacteriia.Fusobacteriales

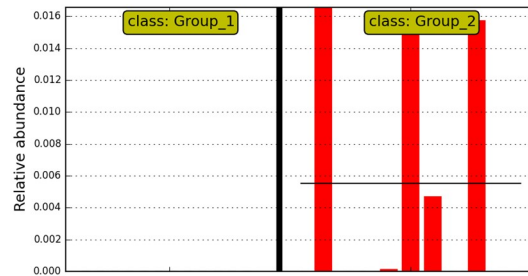

AN Bacteria.Proteobacteria.Epsilonproteobacteria.Campylobacteriales.Campylobacteraceae.Campylobacter .Multi\_affiliation.Cluster\_23

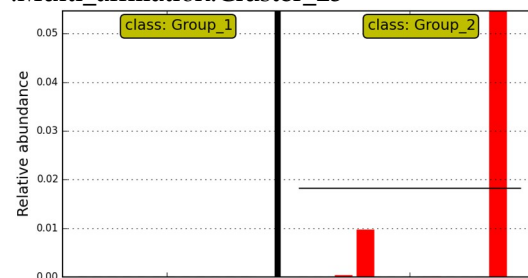

AO Bacteria.Proteobacteria.Gammaproteobacteria

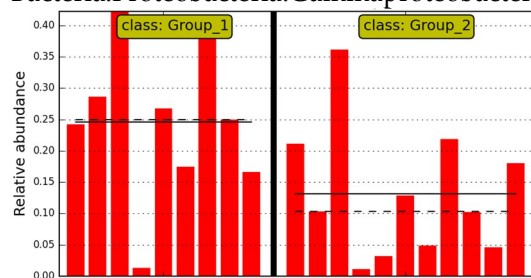

AP Bacteria.Proteobacteria.Gammaproteobacteria.Oceanospirillales.Alcanivoracaceae

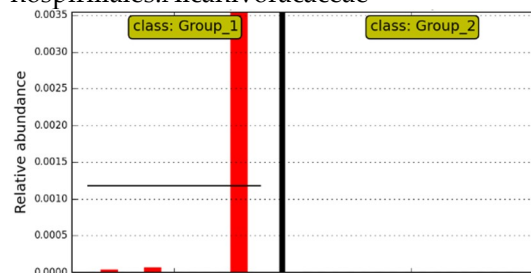

AQ Bacteria.Proteobacteria.Gammaproteobacteria.Oceanospirillales.Alcanivoracaceae.Alcanivorax

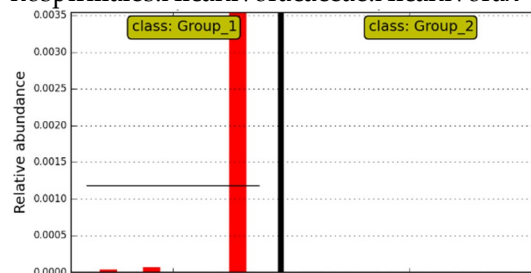

AR Bacteria.Proteobacteria.Gammaproteobacteria.Oceanospirillales.Alcanivoracaceae.Alcanivorax.Unknown

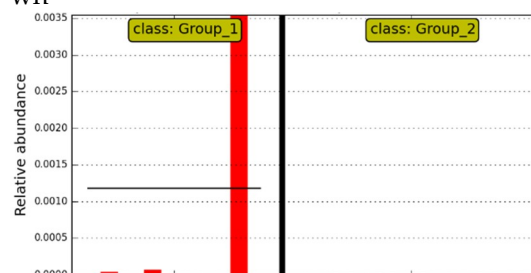

AS Bacteria.Proteobacteria.Gammaproteobacteria.Oceanospirillales.Alcanivoracaceae.Alcanivorax.Unknown.Cluster\_198

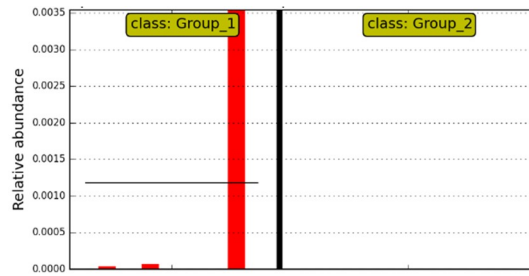

AT Bacteria.Proteobacteria.Gammaproteobacteria.Pseudomonadales

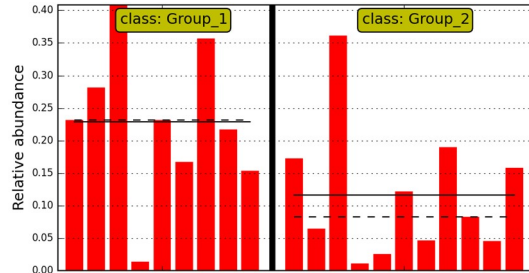

AU Bacteria.Proteobacteria.Gammaproteobacteria.Pseudomonadales.Pseudomonadaceae

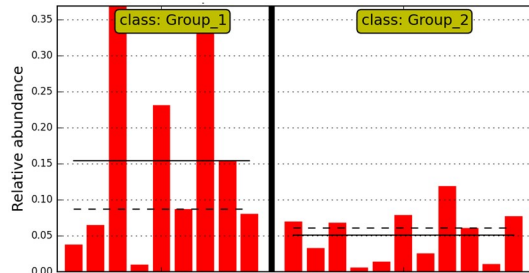

AV Bacteria.Proteobacteria.Gammaproteobacteria.Pseudomonadales.Pseudomonadaceae.Pseudomonas

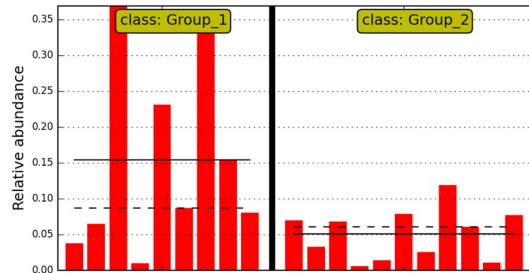

AW Bacteria.Proteobacteria.Gammaproteobacteria.Pseudomonadales.Pseudomonadaceae.Pseudomonas.Multi-affiliation

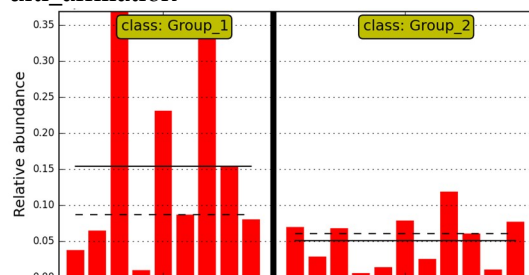

AX Bacteria.Synergistetes

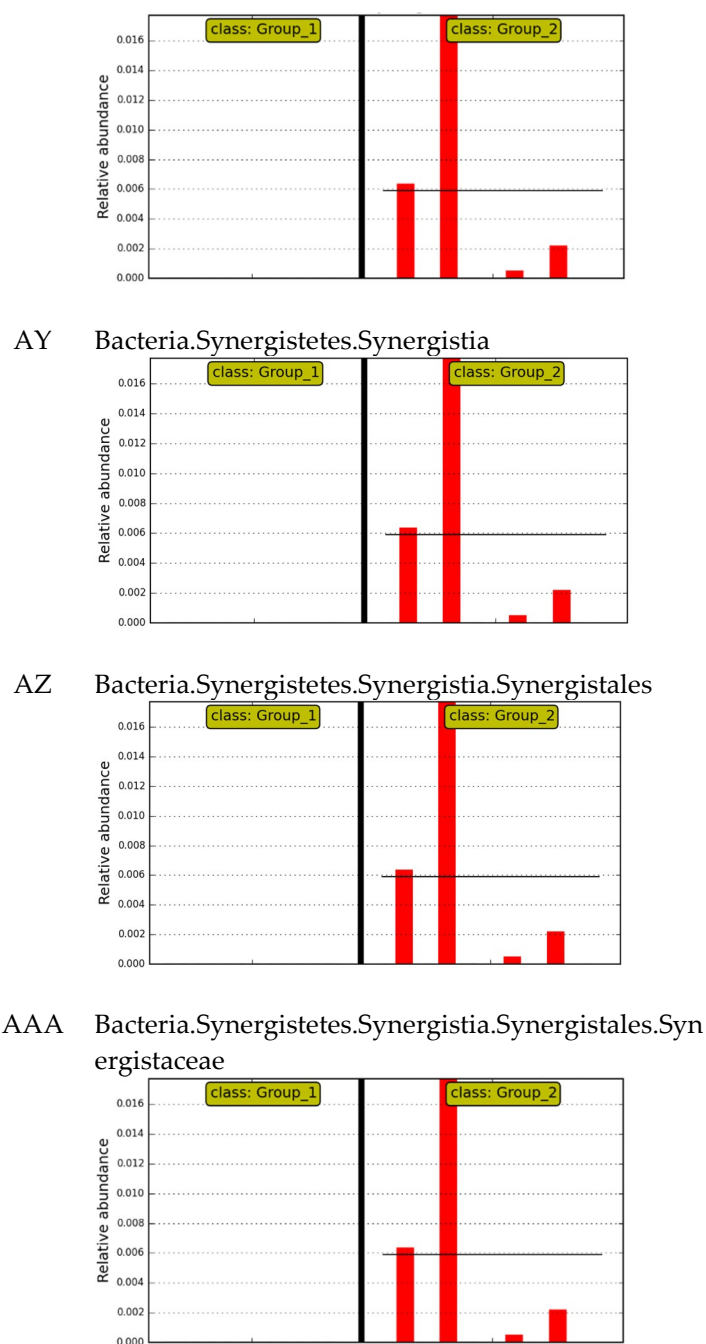

**Figure S3:** A–AAA Barplots show the abundances of the genera and families between the ESRD-PD and ESRD-nonPD. Each bar represents a sample. Group 1 – End-stage renal disease patients undergoing peritoneal dialysis (ESRD-PD); Group 2 – End-stage renal disease patients with intact peritoneal cavity (ESRD-nonPD).

**Figure S4**

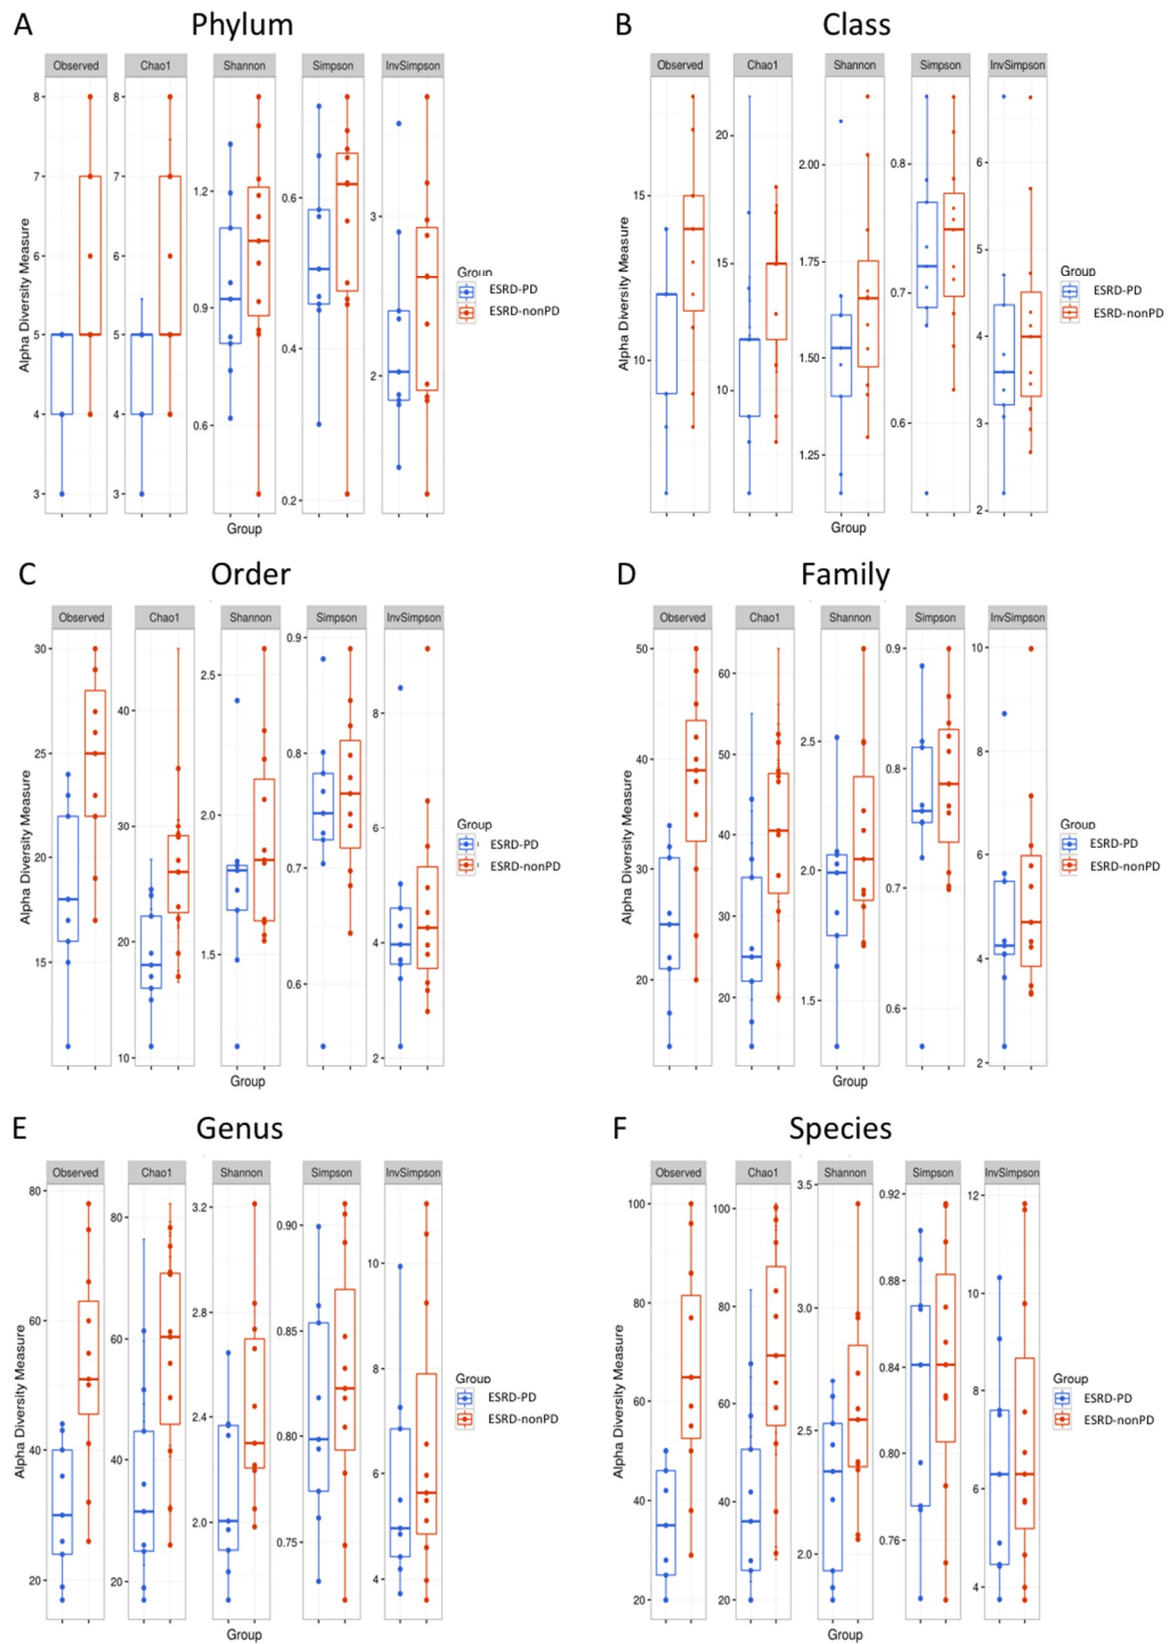



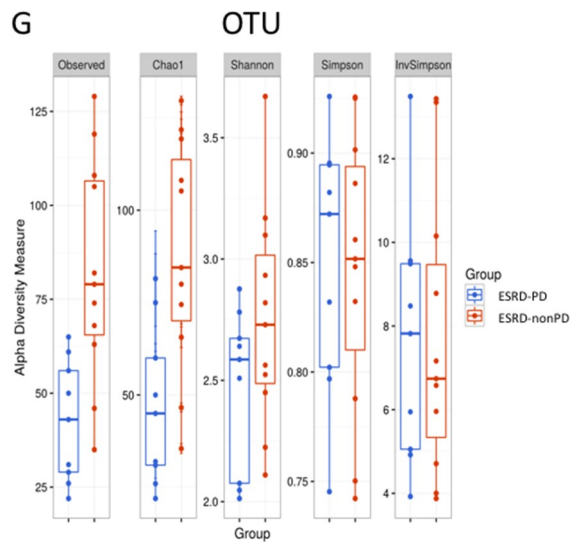

**Figure S4:** Alpha diversity of the peritoneum microbiome community at phylum (A), class (B), order (C), family (D), genus (E), species (F) and OUT (G) taxonomic levels calculated with Observed, Chao1, Shannon, Simpson, and Inverse Simpson indexes. ESRD-PD – End-stage renal disease patients undergoing peritoneal dialysis; ESRD-nonPD – End-stage renal disease patients with intact peritoneal cavity.

**Figure S5**

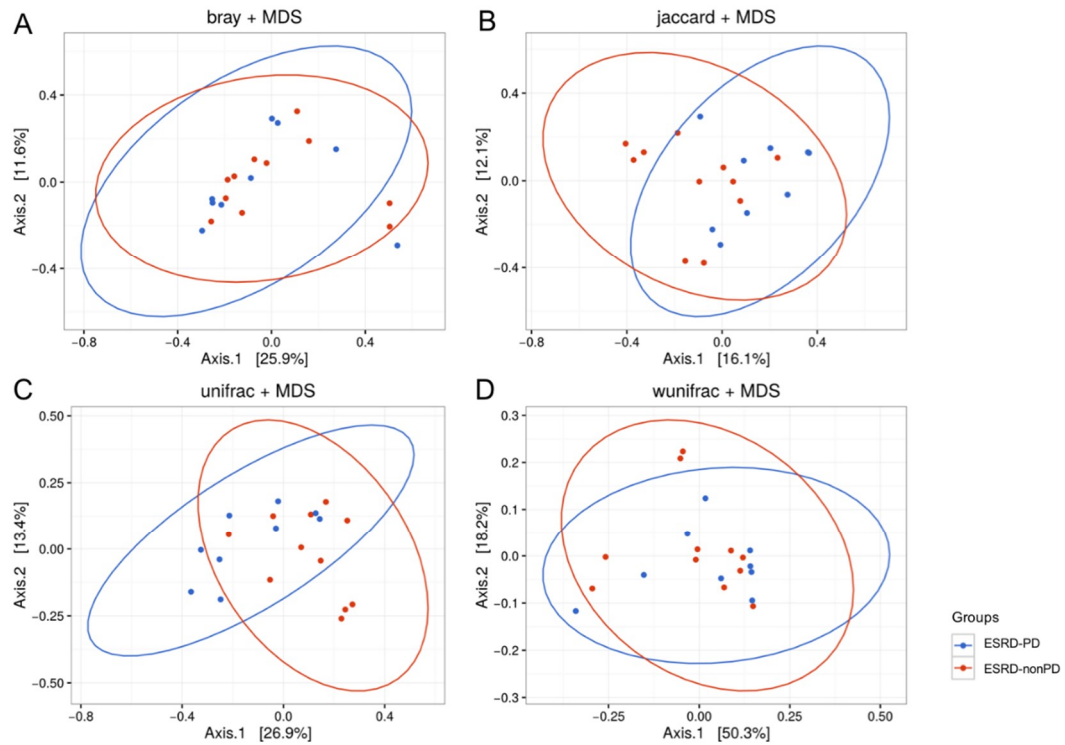

**Figure S5:** Beta-diversity of the peritoneum microbiome community at OTU level with Bray-Curtis (A), Jaccard (B), unweighted Unifrac (C), and Weighted Unifrac (D) distance derived from 16S rRNA gene -based sequencing data. ESRD-PD – End-stage renal disease patients undergoing peritoneal dialysis; ESRD-nonPD – End-stage renal disease patients with intact peritoneal cavity.

**Figure S6**

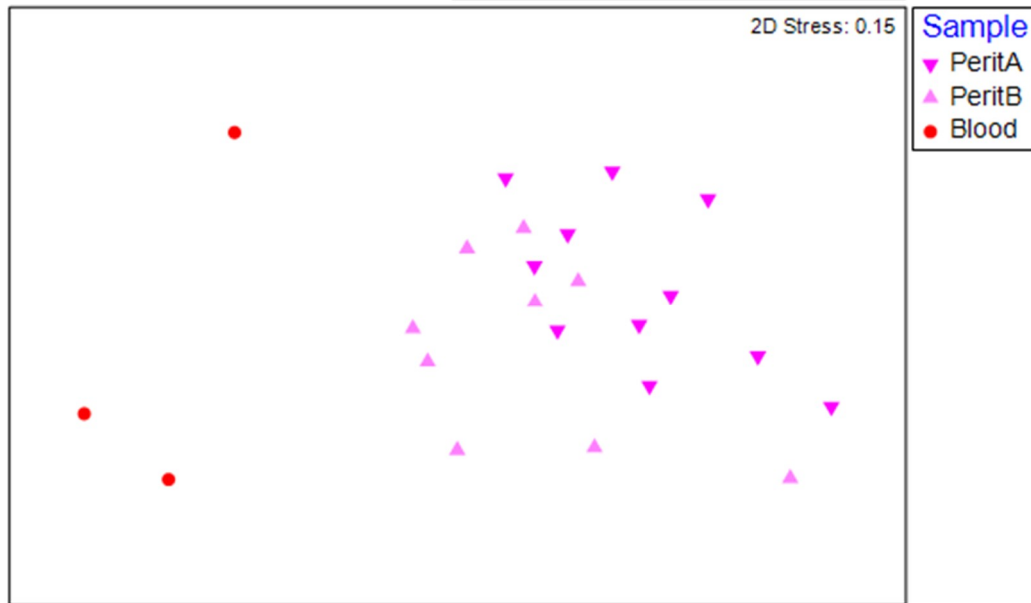

**Figure S6:** Non-metric multidimensional scaling (NMDS) of blood (red sphere) and peritoneum microbiomes of non-PD (pink triangles) and PD (light pink triangles) patients described in this study. The graph was produced in Primer 7 software using the microbiome information for the genera (total reads per taxa were converted to percentage for each sample), squared-root transformed data and using resemblance matrices (similarity data types using Bray-Curtis similarities and adding dummy value).
